# Supplementary material
Source: Elsevier journal article supplement (https://www.sciencedirect.com/science/article/pii/S198888561630044X)
Supplement: mmc1 [file S198888561630044X:mmc1.pdf]

# W.O.S.I.

## WESTERN ONTARIO SHOULDER INSTABILITY INDEX (WOSI)© Version ESPAÑOLA SPANISH versión

**Un instrumento para la evaluación de la calidad de vida ,específico para pacientes con inestabilidad de hombro.**

**Copyright ©1998 (#474672) A. Kirkley, MD and S. Griffin, CSS  
Cross Cultural adaptation to Spanish in 2015 by M. Yuguero PhD MD. et al.**

**Todos los derechos reservados. Ninguna parte de este instrumento de medición puede ser reproducida o transmitida en cualquier forma o por cualquier medio - electrónico, mecánico, incluyendo fotografía, grabación o cualquier sistema de almacenamiento o recuperación - sin el permiso del propietario del copyright.**

**El permiso para reproducir el “cuestionario WOSI” se concederá al titular de esta herramienta para su uso personal. El permiso para reproducir la WOSI se concede regularmente por los autores a los equipos y organizaciones para su propio uso. Las solicitudes de autorización para reproducir el WOSI deben enviarse a: S. Griffin, 1431 Stoneybrook Cres, Londres, Ontario, Canadá N5X 1C3**

**Sugerencia para las citas bibliograficas : The Development and Evaluation of a Disease-Specific Quality of Life Measurement Tool for Shoulder Instability: The Western Ontario Shoulder Instability Index. AJSM 26(6):764-772, 1998.**

## Instrucciones para el paciente

En las secciones A, B, C y D se le pedirá que responda a una serie de preguntas en el formato indicado. Su respuesta debería ser una "/" sobre la línea horizontal

Tenga en cuenta:

1. Si sitúa la "X" en el extremo izquierdo de la línea, por ejemplo

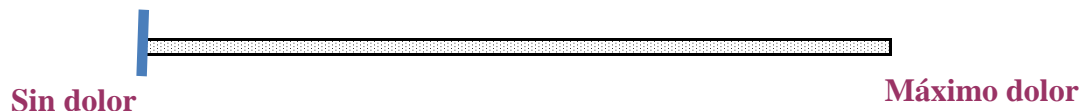

Significa que no siente ningún dolor

2. Si sitúa la "X" en el extremo derecho de la línea, por ejemplo

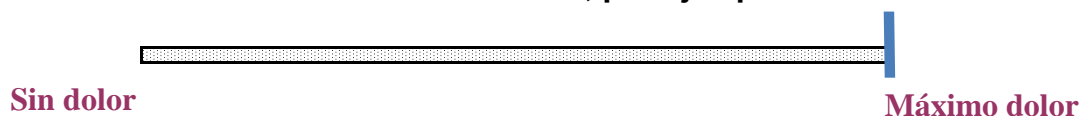

Significa que el dolor es máximo

Tenga presente:

- a) cuanto más a la derecha sitúe la "/", mayor es su percepción del síntoma.
- b) cuanto más a la izquierda sitúe "/", menor es su percepción del síntoma.
- c) no ponga nunca la "/" fuera de los márgenes.

En este cuestionario se le pide que indique en que grado ha sentido el síntoma en cuestión, en relación a su problema de hombro, durante la última semana. Si no está seguro de a que hombro se refiere o tiene cualquier otra duda, por favor pregunte antes de rellenar el cuestionario

Si por alguna razón no entiende alguna de las preguntas, puede consultar las explicaciones que encontrará al final del cuestionario. Después podrá usted colocar la barra "/" en el lugar adecuado sobre la línea horizontal. **Si alguno de los puntos no le parece pertinente o no lo ha experimentado durante la última semana, le pedimos que haga una "suposición" de cual sería la respuesta mas ajustada.**

## Sección A: Examen Físico

### Instrucciones para el paciente

Las preguntas siguientes se refieren a los síntomas físicos que usted haya experimentado a causa de su problema con el hombro. En todos los casos indique la intensidad del síntoma que haya experimentado durante la última semana. (Responda con una "/" sobre la línea horizontal.)

1. ¿Cuánto dolor siente en el hombro con las actividades que requieren elevar los brazos por encima de la cabeza?

Sin dolor

Máximo dolor

2. ¿Cuánto dolor o punzadas siente en el hombro?

Sin dolor/punzadas

Máximo dolor/punzadas

3. ¿Cuánta debilidad o falta de fuerza tiene en el hombro?

Sin debilidad

Máxima debilidad

4. ¿Cuánto cansancio o falta de resistencia siente en el hombro?

Sin falta de fuerza

Máxima falta de fuerza

5. ¿Cuántos chasquidos, crujidos o resaltes siente en el hombro?

Sin chasquidos

Máximos chasquidos

6. ¿Cuánta rigidez siente en el hombro?

Sin rigidez

Máximos rigidez

7. ¿Cuántas molestias siente en los músculos del cuello debido al hombro?

Sin molestias

Máximas molestias

8. ¿Cuánta sensación de inestabilidad o laxitud siente en el hombro?

Sin inestabilidad

Máxima inestabilidad

9. ¿Cuánto compensa con otros músculos la pérdida de fuerza de su hombro?

Mínima compensación

Máxima compensación

10. ¿Cuánta pérdida de movilidad siente en el hombro?

Sin pérdida

Máxima perdida

## Sección B: Deportes/ Recreación/ Trabajo

### Instrucciones para el paciente

Las preguntas siguientes se refieren a como su problema de hombro ha afectado a sus actividades deportivas, recreativas o laborales durante la última semana. En todos los casos indique la intensidad con una "/" sobre la línea horizontal.

11. ¿Cuánto le limita el hombro su participación en actividades deportivas o recreativas?

Sin limitación

Máxima limitación

12. ¿Cuánto afecta el hombro a su capacidad para realizar las tareas propias de su trabajo o deporte? (Si el hombro afecta tanto al trabajo como al deporte, piense en la que resulta más afectada).

No afecta

Afecta al máximo

13. ¿Cuánta necesidad siente de proteger el brazo durante sus actividades?

Ninguna necesidad

Máxima necesidad

14. ¿Cuánta dificultad tiene para levantar objetos pesados por debajo del nivel del hombro?

Sin dificultad

Máxima dificultad

### Sección C: Estilo de vida

#### Instrucciones para el paciente

Las preguntas siguientes se refieren a la manera como su problema de hombro ha afectado o cambiado su estilo de vida. Indique de nuevo la intensidad durante la última semana con una "/" sobre la línea horizontal.

15. ¿Cuánto miedo tiene de caer sobre el hombro?

Sin miedo

Máximo miedo

16. ¿Cuánta dificultad tiene para mantener el nivel de forma física que desea?

Sin dificultad

Máxima dificultad

17. ¿Cuánta dificultad tiene para realizar "actividades bruscas" con la familia y amigos (como jugar a pelear)?

Sin dificultad

Máxima dificultad

18. ¿Cuánta dificultad tiene para dormir a causa del hombro?

Sin dificultad

Máxima dificultad

### Sección D: Emociones

#### Instrucciones para el paciente

Las preguntas siguientes se refieren a la manera como se ha sentido durante la última semana respecto a su problema de hombro. Indique la intensidad con una "X" sobre la línea horizontal.

19. ¿Cuánto está usted pendiente de su hombro?

Nada pendiente

Totalmente pendiente

20. ¿Cuánto le preocupa que el hombro puede empeorar?

Ninguna preocupación

Máxima preocupación

21. ¿Cuánta frustración le produce el hombro?

Sin frustración

Máxima frustración

GRACIAS POR RESPONDER EL CUESTIONARIO

## **Explicación del Significado de las Preguntas del CUESTIONARIO WOSI**

### **Sección A: Síntomas Físicos**

#### **Pregunta 1.**

Se refiere a cualquier actividad que requiera levantar el brazo por encima del hombro, tal como poner platos en un armario, peinarse, nadar *crawl*, pintar un techo o pasar una pelota, etc.

#### **Pregunta 2.**

Se refiere al dolor sordo de fondo, en oposición al dolor agudo corto y repentino.

#### **Pregunta 3.**

Se refiere a la falta de fuerza para realizar actividades usando el brazo.

#### **Pregunta 4.**

Se refiere a la incapacidad o el cansancio de su hombro para realizar alguna actividad.

#### **Pregunta 5.**

Se refiere a los ruidos que se oyen en el hombro al moverlo.

#### **Pregunta 6.**

Se refiere a la sensación de que la articulación no se quiere mover, que suele suceder al levantarse por la mañana, después de algún ejercicio o tras un período de inactividad. No se refiere a la falta de amplitud de movimiento.

#### **Pregunta 7.**

Se refiere a la tensión, dolor o espasmo que siente en los músculos del cuello y que parecen causados por el problema de su hombro.

#### **Pregunta 8.**

Se refiere a la sensación de que su hombro esté a punto de dislocarse total o parcialmente, o que pueda deslizarse o resbalar en alguna dirección.

#### **Pregunta 9.**

Se refiere al hecho de usar los músculos del brazo o la espalda para compensar su hombro al realizar movimientos o actividades.

#### **Pregunta 10.**

Se refiere a no tener el movimiento completo de su hombro en todas o alguna dirección.

### **Sección B: Deportes / Entretenimiento / Trabajo**

#### **Pregunta 11.**

Se refiere a si ha tenido que restringir su participación en alguna actividad o si ha dejado de practicarla totalmente.

#### **Pregunta 12.**

Se refiere a la dificultad que tenga para realizar determinadas tareas requeridas en el trabajo, en el deporte o en actividades recreativas.

**Pregunta 13.**

Se refiere a protegerse el brazo, consciente o inconscientemente, manteniéndolo cerca del cuerpo, cubriéndolo o llevándolo en cabestrillo.

**Pregunta 14.**

No se refiere a levantar objetos por encima de la cabeza, sino a levantar algo pesado por debajo del nivel del hombro, como una bolsa de la compra, material de trabajo, libros, una bola de bolera.

**Sección C: Estilo de vida**

**Pregunta 15.**

Se refiere al miedo a caer sobre el hombro o sobre la mano extendida de ese lado.

**Pregunta 16.**

Se refiere al nivel de forma física que solía tener antes de que el hombro resultara un problema. Incluye una disminución de la capacidad cardiovascular, grado de fuerza y tono muscular.

**Pregunta 17.**

Se refiere a cualquier actividad lúdica con componentes bruscos o virulentos en que usted participaría habitualmente con familia o amigos.

**Pregunta 18.**

Se refiere a tener que cambiar su posición al dormir, despertarse durante la noche, tener problemas para conciliar el sueño o sentirse faltado de descanso debido a su hombro.

**Sección D: Emociones**

**Pregunta 19.**

Se refiere a tener siempre presente su hombro o a tenerlo en consideración antes de hacer alguna cosa.

**Pregunta 20.**

Se refiere a su preocupación porque su hombro esté empeorando en vez de mejorar o seguir igual.

**Pregunta 21.**

Se refiere a sentirse frustrado por su incapacidad para hacer cosas que antes hacía, o que desearía hacer pero no puede a causa de su hombro.

## PUNTUACIÓN CUESTIONARIO WOSI

1. Tome la distancia desde el extremo izquierdo de la "/" y calcule la puntuación sobre 100 (anote hasta los 0,5 mm más próximos). Apúntelo en el espacio destinado a esa pregunta.

2. Puede calcular una cifra total para cada apartado (Síntomas Físicos / 1.000; Deportes / Entretenimiento / Trabajo / 400; Estilo de Vida / 400; Emociones / 300) o el total de cada apartado puede sumarse para obtener un total acumulado sobre 2.100.

3. Hay quien considera más significativo apuntar los resultados sobre 100, es decir como porcentaje del resultado directo. Puesto que la peor puntuación posible es 2.100, el total acumulado se resta de 2.100 y se divide por 21. Por ejemplo, para un paciente con un total acumulado de 1.625, el resultado sobre 100 será:

$$\frac{2.100 - 1.625}{21} = 22,6\%$$

Lo mismo puede aplicarse a cada apartado.

| Síntomas físicos              | Deporte, tiempo libre, actividad laboral | Emociones                   |
|-------------------------------|------------------------------------------|-----------------------------|
| SF 1                          | D/TL/L 11                                | E19                         |
| SF 2                          | D/TL/L 12                                | E20                         |
| SF 3                          | D/TL/L 13                                | E21                         |
| SF 4                          | D/TL/L 14                                | Total: 300-___/3=___%       |
| SF 5                          | Total: 400-___ / 4 = ___%                |                             |
| SF 6                          | <b>Estilo de vida</b>                    | <b>Puntuación total</b>     |
| SF 7                          | V15                                      | SF                          |
| SF 8                          | V16                                      | D/TL/L                      |
| SF 9                          | V17                                      | V                           |
| SF 10                         | V18                                      | E                           |
| Total: 1000 - ___ / 10 = ___% | Total: 400 - ___ / 4 = ___%              | Total: 2100-___ / 21 = ___% |

WOSI VERSION ESPAÑOLA
